# Supplementary material for: Economic impact of the first pass effect in mechanical thrombectomy for acute ischaemic stroke treatment in Spain: a cost-effectiveness analysis from the national health system perspective
Source: PubMed Central journal article supplement — BMJ Open. 2022 Sep 1;12(9):e054816. doi: 10.1136/bmjopen-2021-054816 (PMC9438077; doi:10.1136/bmjopen-2021-054816), 2022-09-01
Supplement: bmjopen-2021-054816supp001.pdf [file bmjopen-2021-054816supp001.pdf]

**Table A1. Relative risk of death by mRS [1]**

| <b>mRS score</b> | <b>RR</b> |
|------------------|-----------|
| mRS 0            | 1.00      |
| mRS 1            | 1.00      |
| mRS 2            | 1.12      |
| mRS 3            | 1.66      |
| mRS 4            | 1.92      |
| mRS 5            | 2.57      |

**Table A2. Lifetable Spain by age and gender [2]**

| <b>Other-cause mortality</b> |             |               |
|------------------------------|-------------|---------------|
| <b>Age</b>                   | <b>Male</b> | <b>Female</b> |
| 0                            | 0.276%      | 0.245%        |
| 1                            | 0.023%      | 0.018%        |
| 2                            | 0.013%      | 0.008%        |
| 3                            | 0.012%      | 0.009%        |
| 4                            | 0.014%      | 0.007%        |
| 5                            | 0.010%      | 0.009%        |
| 6                            | 0.007%      | 0.006%        |
| 7                            | 0.007%      | 0.005%        |
| 8                            | 0.009%      | 0.007%        |
| 9                            | 0.007%      | 0.004%        |
| 10                           | 0.007%      | 0.006%        |
| 11                           | 0.008%      | 0.007%        |
| 12                           | 0.007%      | 0.007%        |
| 13                           | 0.010%      | 0.005%        |
| 14                           | 0.008%      | 0.013%        |
| 15                           | 0.013%      | 0.011%        |
| 16                           | 0.021%      | 0.011%        |
| 17                           | 0.016%      | 0.015%        |
| 18                           | 0.030%      | 0.014%        |
| 19                           | 0.026%      | 0.010%        |
| 20                           | 0.029%      | 0.014%        |
| 21                           | 0.034%      | 0.015%        |
| 22                           | 0.030%      | 0.014%        |
| 23                           | 0.037%      | 0.014%        |
| 24                           | 0.039%      | 0.019%        |
| 25                           | 0.032%      | 0.019%        |
| 26                           | 0.048%      | 0.015%        |

|    |        |        |
|----|--------|--------|
| 27 | 0.036% | 0.014% |
| 28 | 0.049% | 0.018% |
| 29 | 0.055% | 0.018% |
| 30 | 0.046% | 0.028% |
| 31 | 0.054% | 0.022% |
| 32 | 0.048% | 0.022% |
| 33 | 0.052% | 0.025% |
| 34 | 0.062% | 0.031% |
| 35 | 0.062% | 0.034% |
| 36 | 0.066% | 0.033% |
| 37 | 0.065% | 0.036% |
| 38 | 0.071% | 0.042% |
| 39 | 0.082% | 0.044% |
| 40 | 0.091% | 0.052% |
| 41 | 0.098% | 0.059% |
| 42 | 0.107% | 0.059% |
| 43 | 0.123% | 0.073% |
| 44 | 0.120% | 0.069% |
| 45 | 0.143% | 0.087% |
| 46 | 0.169% | 0.095% |
| 47 | 0.191% | 0.112% |
| 48 | 0.228% | 0.110% |
| 49 | 0.244% | 0.143% |
| 50 | 0.289% | 0.149% |
| 51 | 0.325% | 0.162% |
| 52 | 0.349% | 0.173% |
| 53 | 0.388% | 0.211% |
| 54 | 0.473% | 0.220% |
| 55 | 0.517% | 0.233% |
| 56 | 0.557% | 0.259% |
| 57 | 0.601% | 0.286% |
| 58 | 0.675% | 0.312% |
| 59 | 0.720% | 0.339% |
| 60 | 0.803% | 0.364% |
| 61 | 0.895% | 0.384% |
| 62 | 0.977% | 0.420% |
| 63 | 1.055% | 0.451% |
| 64 | 1.116% | 0.496% |
| 65 | 1.219% | 0.504% |
| 66 | 1.318% | 0.574% |
| 67 | 1.436% | 0.616% |
| 68 | 1.514% | 0.620% |

|     |         |         |
|-----|---------|---------|
| 69  | 1.700%  | 0.720%  |
| 70  | 1.911%  | 0.787%  |
| 71  | 1.990%  | 0.849%  |
| 72  | 2.215%  | 0.937%  |
| 73  | 2.370%  | 1.051%  |
| 74  | 2.627%  | 1.233%  |
| 75  | 2.872%  | 1.403%  |
| 76  | 3.074%  | 1.570%  |
| 77  | 3.492%  | 1.763%  |
| 78  | 4.139%  | 2.142%  |
| 79  | 4.500%  | 2.474%  |
| 80  | 5.153%  | 2.928%  |
| 81  | 5.708%  | 3.368%  |
| 82  | 6.436%  | 3.838%  |
| 83  | 7.209%  | 4.440%  |
| 84  | 8.410%  | 5.257%  |
| 85  | 9.184%  | 6.197%  |
| 86  | 10.539% | 7.184%  |
| 87  | 11.846% | 8.422%  |
| 88  | 13.304% | 9.728%  |
| 89  | 15.057% | 11.340% |
| 90  | 16.914% | 13.272% |
| 91  | 19.683% | 14.947% |
| 92  | 20.636% | 16.507% |
| 93  | 23.300% | 18.967% |
| 94  | 25.526% | 21.541% |
| 95  | 27.536% | 23.666% |
| 96  | 29.487% | 26.675% |
| 97  | 31.265% | 28.241% |
| 98  | 32.711% | 29.794% |
| 99  | 26.429% | 30.496% |
| 100 | 48.238% | 46.382% |

**Table A3. Recurrent Stroke Rates [3]**

| <b>Year</b>    | <b>Recurrent Stroke Rate</b> |
|----------------|------------------------------|
| Year 1         | 4.91%                        |
| Year 2 onwards | 2.01%                        |

**Table A4. Health States Utilities [4]**

| mRS   | Utility |
|-------|---------|
| mRS 0 | 0.936   |
| mRS 1 | 0.817   |
| mRS 2 | 0.681   |
| mRS 3 | 0.558   |
| mRS 4 | 0.265   |
| mRS 5 | -0.054  |
| mRS 6 | 0       |

**Table A5. Unit costs, consumption and total management costs for each group of patients [5] [6]**

| AIS diagnosis + IV-tPA (tPA 30% of patients)                               |               |       |                |
|----------------------------------------------------------------------------|---------------|-------|----------------|
| Item                                                                       | Unit cost (€) | Units | Total cost (€) |
| Neurologist                                                                | 36.19         | 1.0   | 36.19          |
| Neuroradiologist                                                           | 36.19         | 0.5   | 18.09          |
| Resident Doctor                                                            | 12.56         | 1.0   | 12.56          |
| Nurse 1                                                                    | 22.01         | 0.5   | 11.01          |
| Nurse 2                                                                    | 22.01         | 0.5   | 11.01          |
| Technician                                                                 | 17.54         | 0.5   | 8.77           |
| Cranial CT scan                                                            | 84.83         | 1.0   | 84.83          |
| Blood test                                                                 | 46.10         | 1.0   | 46.10          |
| Electrocardiogram                                                          | 40.26         | 1.0   | 40.26          |
| Chest Radiograph                                                           | 26.58         | 0.5   | 13.29          |
| Computerized tomography angiography                                        | 279.25        | 1.0   | 279.25         |
| Perfusion computerized tomography                                          | 252.17        | 0.5   | 126.08         |
| Nursing Assistant 1                                                        | 13.07         | 0.5   | 4.71           |
| Orderly                                                                    | 13.07         | 0.5   | 6.53           |
| Alteplase (0,9 mg/kg; average patient weight 75 kg), (30% of the patients) | 9.85          | 67.5  | 199.67         |
| MRI (0.5% of the patients)                                                 | 204.48        | 0.05  | 3.07           |
| Costs group "FIRST PASS"                                                   |               |       |                |
| Stent retriever                                                            | 3.388         | 1.0   | 3.388          |
| Intracranial catheter                                                      | 2.178         | 1.0   | 2.178          |
| Ballon guide catheter/ Long Sheath                                         | 786.5         | 1.0   | 786,5          |
| Guide/Microguide (0.35/0.12/0.14)                                          | 484           | 1.0   | 484            |
| Microcatheter                                                              | 605           | 1.0   | 605            |
| Introducer                                                                 | 15.73         | 1.0   | 15.73          |
| Procedure pack + gloves                                                    | 32.05         | 1.0   | 32.05          |
| Vascular closure device                                                    | 187.67        | 1.0   | 187.67         |
| Diagnosis catheter + contrast                                              | 50.05         | 1.0   | 50.05          |

|                                      |          |      |          |
|--------------------------------------|----------|------|----------|
| PTA balloon catheter                 | 250.23   | 0.3  | 75.07    |
| Carotid stent                        | 1,376.25 | 0.15 | 206.44   |
| Anesthetist                          | 36.19    | 3.0  | 108.56   |
| Neurologist                          | 36.19    | 0.2  | 7.24     |
| Neuroradiologist                     | 36.19    | 3.0  | 108.56   |
| Orderly                              | 13.07    | 0.5  | 6.53     |
| Nurse                                | 22.01    | 6.0  | 132.07   |
| Cranial computerized tomography scan | 84.83    | 1.0  | 84.83    |
| <b>Costs group "Non-FIRST PASS"</b>  |          |      |          |
| Stent retriever                      | 3,388    | 1.20 | 4,065.60 |
| Intracranial catheter                | 2,178    | 1.20 | 2,613.60 |
| Balloon guide catheter/ Long Sheath  | 786.5    | 1.00 | 786.50   |
| Guide/Microguide (0.35/0.12/0.14)    | 484      | 1.20 | 580.80   |
| Microcatheter                        | 605      | 1.10 | 665.50   |
| Introducer                           | 15.73    | 1.00 | 15.73    |
| Procedure pack + gloves              | 32.05    | 1.00 | 32.05    |
| Vascular closure device              | 187.67   | 1.00 | 187.67   |
| Diagnosis catheter + contrast        | 50.05    | 1.00 | 48,40    |
| PTA balloon catheter                 | 250.23   | 0.30 | 75.07    |
| Carotid stent                        | 1,376.25 | 0.15 | 206.44   |
| Anesthetist                          | 36.19    | 4.00 | 144.75   |
| Neurologist                          | 36.19    | 0.20 | 7.24     |
| Neuroradiologist                     | 36.19    | 4.00 | 144.75   |
| Orderly                              | 13.07    | 0.5  | 6.53     |
| Nurse                                | 22.01    | 8.00 | 176.09   |
| Cranial computerized tomography scan | 84.83    | 1.00 | 84.83    |

**Table A6 – Subject Demographics and Baseline Characteristics (Base-case Population) [7]**

| Characteristic                                        | FPE<br>(N=304)                     | Non FPE<br>(N=350)                 | P value<br>(FPE vs. non FPE) |
|-------------------------------------------------------|------------------------------------|------------------------------------|------------------------------|
| Age (years)                                           | 69.9±14.93(304)<br>72.0(61-80)     | 66.7±14.70(350)<br>68.0(58-79)     | 0.7771                       |
| Sex (Male)                                            | 162/304(53.3%)                     | 189/350(54.0%)                     | 0.8558                       |
| Pre-stroke mRS                                        |                                    |                                    | 0.0152                       |
| 0                                                     | 220/304(72.4%)                     | 280/350(80.0%)                     |                              |
| 1                                                     | 72/304(23.7%)                      | 63/350(18.0%)                      |                              |
| 2*                                                    | 12/304(3.9%)                       | 7/350(2.0%)                        |                              |
| Initial Qualifying<br>NIHSS Score<br>(Baseline NIHSS) | 17.0±5.41(304)<br>17.0(13-21)      | 17.3±5.54(350)<br>18.0(12-21)      | 0.6769                       |
| Total ASPECTS<br>Score                                | 8.3±1.53(266)<br>9.0(8-9)          | 8.1±1.59(303)<br>8.0(8-9)          | 0.4737                       |
| IV tPA<br>administered                                | 181/304(59.5%)                     | 237/350(67.7%)                     | 0.0299                       |
| IA-tPA used                                           | 29/303(9.6%)                       | 63/348(18.1%)                      | 0.0018                       |
| General<br>Anesthesia Used<br>(Site-Reported)         | 78/303(25.7%)                      | 109/348(31.3%)                     | 0.1166                       |
| Stroke onset to<br>puncture (min)                     | 226.6±99.90(301)<br>215.0(150-295) | 217.4±99.33(349)<br>194.0(143-278) | 0.9172                       |

Summary statistics: Mean±SD(n), Median (IQR) for continuous and n/N (%) for categorical variables.

\*Patients with Pre-mRS of 2 are enrolled under Rev B protocol.

Each P-value was based on T test (2-sided) for the mean difference and Z test (2-sided) for the proportion difference between FPE and non FPE; mRS scores between FPE and Non-FPE are compared using Mantel-Haenszel Chi-square test.

**Table A7 – Subject Demographics and Baseline Characteristics (Alternative scenario Population) [7]**

| Characteristic                                        | FPE<br>(N=317)                      | Non FPE<br>(N=431)                  | P value<br>(FPE vs. non FPE) |
|-------------------------------------------------------|-------------------------------------|-------------------------------------|------------------------------|
| Age (years)                                           | 69.7±14.85(317)<br>72.0(61-80)      | 67.1±14.61(431)<br>68.0(58-79)      | 0.7459                       |
| Sex (Male)                                            | 170/317(53.6%)                      | 225/431(52.2%)                      | 0.6999                       |
| Pre-stroke mRS                                        |                                     |                                     | 0.0380                       |
| 0                                                     | 230/317(72.6%)                      | 340/431(78.9%)                      |                              |
| 1                                                     | 75/317(23.7%)                       | 81/431(18.8%)                       |                              |
| 2*                                                    | 12/317(3.8%)                        | 10/431(2.3%)                        |                              |
| Initial Qualifying<br>NIHSS Score<br>(Baseline NIHSS) | 17.1±5.41(317)<br>17.0(13-21)       | 17.3±5.54(431)<br>18.0(12-21)       | 0.6550                       |
| Total ASPECTS Score                                   | 8.3±1.51(275)<br>9.0(8-9)           | 8.1±1.65(378)<br>8.0(7-9)           | 0.1184                       |
| IV tPA administered                                   | 193/317(60.9%)                      | 285/431(66.1%)                      | 0.1402                       |
| IA-tPA used                                           | 31/316(9.8%)                        | 79/428(18.5%)                       | 0.0010                       |
| General Anesthesia<br>Used (Site-Reported)            | 80/316(25.3%)                       | 138/428(32.2%)                      | 0.0402                       |
| Stroke onset to<br>puncture (min)                     | 227.2±100.86(314)<br>213.5(150-295) | 222.9±101.11(428)<br>199.5(146-290) | 0.9660                       |

Summary statistics: Mean±SD(n), Median (IQR) for continuous and n/N (%) for categorical variables.

\*Patients with Pre-mRS of 2 are enrolled under Rev B protocol.

Each P-value was based on T test (2-sided) for the mean difference and Z test (2-sided) for the proportion difference between FPE and non FPE; mRS scores between FPE and Non-FPE are compared using Mantel-Haenszel Chi-square test.

**Table A8 – Medical and Neurological History (Base-case Population) [7]**

|                                            | FPE<br>(N=304) | Non FPE<br>(N=350) | P value<br>(FPE vs. non FPE) |
|--------------------------------------------|----------------|--------------------|------------------------------|
| Atrial flutter/Atrial fibrillation         | 128/304(42.1%) | 120/350(34.3%)     | 0.0398                       |
| Systemic Hypertension                      | 217/304(71.4%) | 262/350(74.9%)     | 0.3166                       |
| Diabetes mellitus                          | 91/304(29.9%)  | 93/350(26.6%)      | 0.3401                       |
| Myocardial disease/Coronary artery disease | 95/304(31.3%)  | 85/350(24.3%)      | 0.0467                       |
| Hyperlipidemia                             | 129/304(42.4%) | 155/350(44.3%)     | 0.6337                       |
| Peripheral artery disease                  | 13/304(4.3%)   | 13/350(3.7%)       | 0.7137                       |
| Carotid artery disease                     | 33/304(10.9%)  | 17/350(4.9%)       | 0.0040                       |
| Current or former tobacco use              | 137/304(45.1%) | 162/350(46.3%)     | 0.7548                       |
| <b>Neurological history</b>                |                |                    |                              |
| Previous ischemic stroke                   | 43/304(14.1%)  | 34/350(9.7%)       | 0.0795                       |
| Previous hemorrhagic stroke                | 3/304(1.0%)    | 3/350(0.9%)        | 0.8622                       |
| Previous TIA                               | 20/304(6.6%)   | 17/350(4.9%)       | 0.3418                       |
| Brain aneurysm                             | 3/304(1.0%)    | 1/350(0.3%)        | 0.2514                       |

Summary Statistics for categorical: n/N (%)

Each P-value was based on Z test (2-sided) for the proportion difference between FPE and non-FPE



**Table A9 – Medical and Neurological History (Alternative scenario Population) [7]**

|                                            | FPE<br>(N=317) | Non FPE<br>(N=431) | P value<br>(FPE vs. non FPE) |
|--------------------------------------------|----------------|--------------------|------------------------------|
| Atrial flutter/Atrial fibrillation         | 134/317(42.3%) | 152/431(35.3%)     | 0.0514                       |
| Systemic Hypertension                      | 223/317(70.3%) | 327/431(75.9%)     | 0.0907                       |
| Diabetes mellitus                          | 91/317(28.7%)  | 111/431(25.8%)     | 0.3688                       |
| Myocardial disease/Coronary artery disease | 96/317(30.3%)  | 112/431(26.0%)     | 0.1948                       |
| Hyperlipidemia                             | 132/317(41.6%) | 192/431(44.5%)     | 0.4278                       |
| Peripheral artery disease                  | 13/317(4.1%)   | 16/431(3.7%)       | 0.7856                       |
| Carotid artery disease                     | 35/317(11.0%)  | 27/431(6.3%)       | 0.0192                       |
| Current or former tobacco use              | 143/317(45.1%) | 202/431(46.9%)     | 0.6338                       |
| <b>Neurological history</b>                |                |                    |                              |
| Previous ischemic stroke                   | 46/317(14.5%)  | 43/431(10.0%)      | 0.0584                       |
| Previous hemorrhagic stroke                | 3/317(0.9%)    | 4/431(0.9%)        | 0.9795                       |
| Previous TIA                               | 20/317(6.3%)   | 22/431(5.1%)       | 0.4794                       |
| Brain aneurysm                             | 4/317(1.3%)    | 3/431(0.7%)        | 0.4271                       |

Summary Statistics for categorical: n/N (%)

Each P-value was based on Z test (2-sided) for the proportion difference between FPE and non-FPE

**Table A10. Adverse events Base-Case and alternative scenario**

| <b>Patient group<br/>Base case</b>                                                                                                                       | <b>symptomatic intracranial<br/>hemorrhage*</b> | <b>malignant cerebral edema</b> |
|----------------------------------------------------------------------------------------------------------------------------------------------------------|-------------------------------------------------|---------------------------------|
| FPE                                                                                                                                                      | 0.7%                                            | 1%                              |
| Non-FPE                                                                                                                                                  | 2.3%                                            | 1.4%                            |
| P-values are obtained from<br>Fisher's exact test                                                                                                        | 0.1154                                          | 0.7303                          |
| <b>Patient group<br/>Alternative Scenario</b>                                                                                                            | <b>symptomatic intracranial<br/>hemorrhage</b>  | <b>malignant cerebral edema</b> |
| FPE                                                                                                                                                      | 0.6%                                            | 0.9%                            |
| Non-FPE                                                                                                                                                  | 2.1%                                            | 1.4%                            |
| P-values are obtained from<br>Fisher's exact test.                                                                                                       | 0.1297                                          | 0.7403                          |
| *sICH is defined as any PH1, PH2, RIH, IVH or SAH per imaging core lab and associated with $\geq$ 4 points worsening on the NIHSS scale within 24 hours. |                                                 |                                 |

## References:

1. Slot KB, Berge E, Sandercock P, et al. Causes of death by level of dependency at 6 months after ischaemic stroke in 3 large cohorts. *Stroke* 2009; 40: 1585–1589.
2. Instituto Nacional de Estadística. 2018 Mortality tables of Spanish population. National results. In: INEbase. [Internet]. 2018 [cited 2020 Oct 10]. Available from: [www.ine.es](http://www.ine.es)
3. Mohan KM, Wolfe CDA, Rudd AG, Heuschmann PU, Kolominsky-Rabas PL, Grieve AP. Risk and cumulative risk of stroke recurrence: A systematic review and meta-analysis. *Stroke*. 2011;42(5):1489–94. E
4. Rivero-Arias O, Ouellet M, Gray A, Wolstenholme J, Rothwell PM, Luengo-Fernandez R. Mapping the modified rankin scale (mRS) measurement into the generic EuroQol (EQ-5D) health outcome. *Med Decis Mak*. 2010;30(3):341–54.
5. de Andrés-Nogales F, Álvarez M, de Miquel MÁ, Segura T, Gil A, Cardona P, et al. Cost-effectiveness of mechanical thrombectomy using stent retriever after intravenous tissue plasminogen activator compared with intravenous tissue plasminogen activator alone in the treatment of acute ischaemic stroke due to large vessel occlusion in Spa. *Eur Stroke J*. 2017;2(3):272–84.
6. Expert opinion
7. Mueller-Kronast NH, Zaidat OO, Froehler MT, Jahan R, et al. Systematic Evaluation of Patients Treated With Neurothrombectomy Devices for Acute Ischemic Stroke: Primary Results of the STRATIS Registry. *Stroke*. 2017;48(10):2760–8.
